# Supplementary material for: Acoustic Characterization Study of Beef Loins Using Ultrasonic Transducers
Source: MDPI journal article supplement (doi:10.3390/s23239564), 2023-12-01
Supplement: s1 [file s1]

**Table S1.** Characteristics of the transducer models used.

| Model               | Diameter<br>(cm) | Frequency<br>(kHz) | Wavelength<br>(mm) | -6 dB<br>bandwidth<br>(%) | N<br>(cm) | $\varphi$<br>(°) | Waveform<br>duration ( $\mu$ s) |       |        |
|---------------------|------------------|--------------------|--------------------|---------------------------|-----------|------------------|---------------------------------|-------|--------|
|                     |                  |                    |                    |                           |           |                  | 14dB                            | 20 dB | 40 dB  |
| Panametrics V318-SU | 1.9              | 500                | 3.14               | 61.93                     | 2.87      | 11.6             | 3.680                           | 4.888 | 16.600 |
| Panametrics A114S   | 1.9              | 1000               | 1.54               | 64.59                     | 5.86      | 5.67             | 2.540                           | 2.900 | 6.079  |

UPV=1570 m/s in case of V318 and 1540 m/s in case of A114 were taken for the calculation of wavelength, N, and  $\varphi$

N= near-field length

$\varphi$ = beam angle

The bandwidth and waveform direction values were obtained according to the following conditions:

Damping: 500 ohms; Attn: 36 dB; Gain: 40 dB

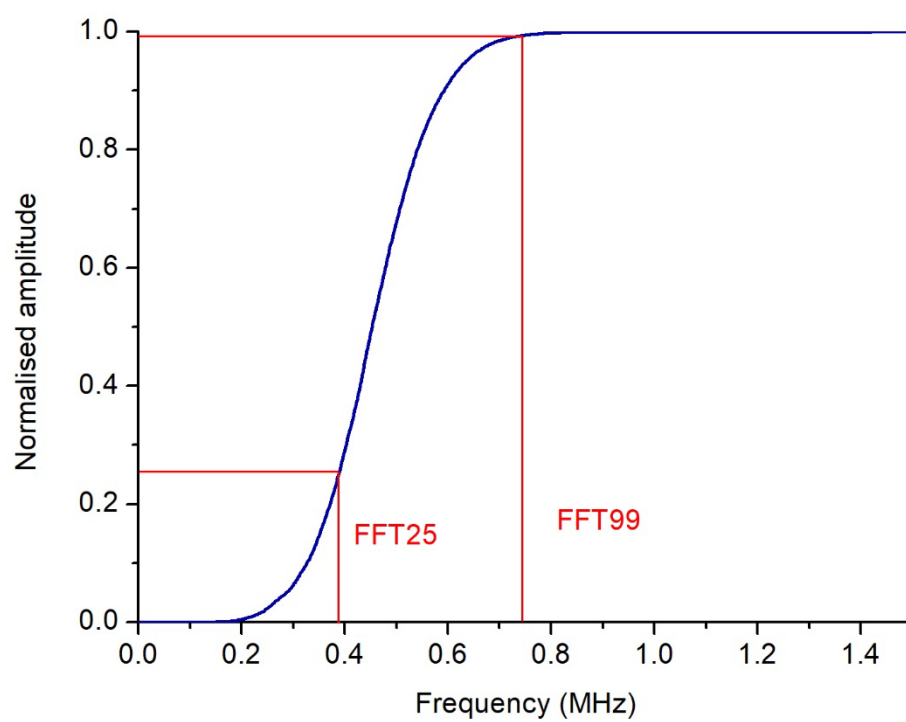

**Figure S1.** Cumulative frequency periodogram corresponding to the FFT shown in Figure 5. The 25th and 99th percentiles of the frequencies are explicitly indicated.

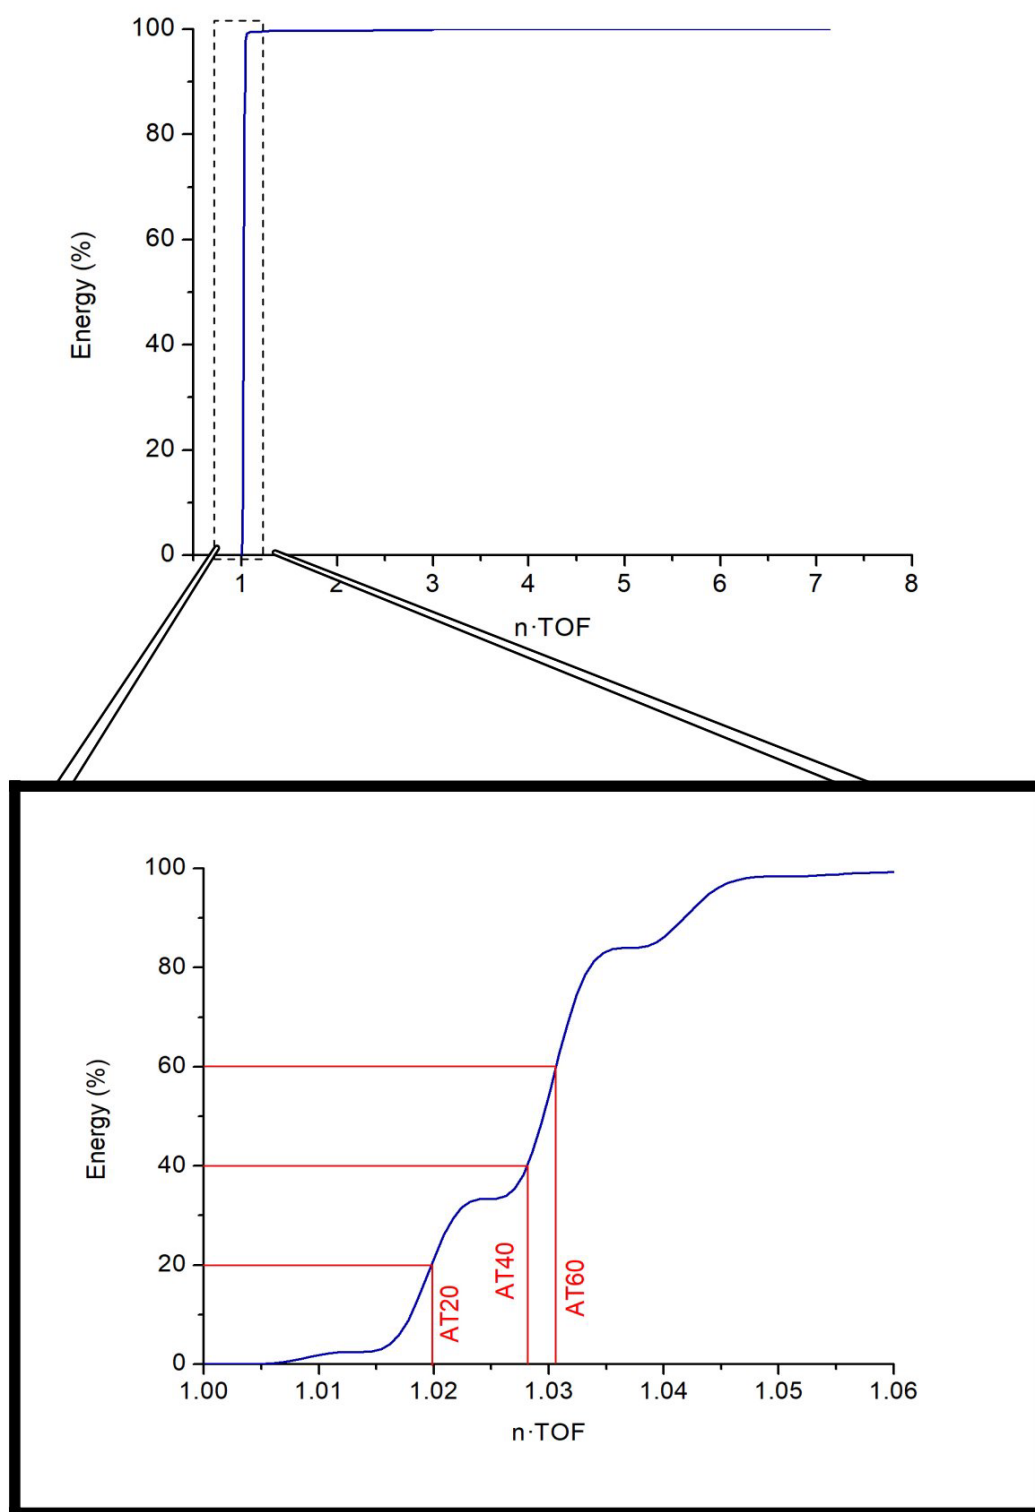

**Figure S2.** Attenuation curve corresponding to the A-scan shown in Figure 4a. The AT20, AT40, and AT60 attenuation values are explicitly indicated.
